# Supplementary material
Source: Springer Nature journal article supplement (https://www.springermedizin.de/resource/supplementary/12891_2010_861_MOESM1_ESM.pdf/9506578)
Supplement: MOESM1 [file 9506578]

Screening of potential participants by  
Providers/Insurers  
Eligible participants referred to the study

Agree to participate

Non – volunteers

When 20 volunteers are recruited, random  
allocated to intervention or usual care group

Intervention Group  
n = 10

8 weeks usual care + SMRTW  
intervention provided by trained  
facilitators

Post-intervention  
Follow-up

6 month post-intervention  
Follow-up

12 month post-intervention  
Follow-up

Usual care  
n = 10

8 weeks usual care

Post-intervention  
Follow-up

6 month post-intervention  
Follow-up

12 month post-intervention  
Follow-up
